# Supplementary material for: Sulfur vacancy modulated nickel-doped Co4S3hollow nanocube/nitrogen-doped V2CTxMXene nanosheet composites for optimizing the hydrogen evolution reaction
Source: Royal Society of Chemistry journal article supplement (doi:10.1039/d2qm01085b), 2022-12-09
Supplement: d2qm01085b1.pdf [file d2qm01085b1.pdf]

**Supporting information for:**

**Sulfur vacancies modulated nickel-doped  $\text{Co}_4\text{S}_3$  hollow nanocubes/nitrogen-doped  $\text{V}_2\text{CT}_x$  MXene nanosheets composite for optimizing hydrogen evolution reaction**

Yu Zhou,<sup>#a</sup> Yousen Wu,<sup>#a</sup> Dongxuan Guo,<sup>\*a,b</sup> Jinlong Li,<sup>\*a,b</sup> Guohua Dong,<sup>\*a,b</sup> Dong-Feng Chai,<sup>a,b</sup> Xue Yang,<sup>a</sup> Shanshan Fu,<sup>a,b</sup> Guozhe Sui<sup>a,b</sup>

a College of Chemistry and Chemical Engineering, Qiqihar University, Qiqihar, 161006, China.

b Key Laboratory of Fine Chemicals of College of Heilongjiang Province, Qiqihar University, Qiqihar, 161006, China.

\*Correspondence:           dongxuanguo92@gmail.com;           jinlong141@163.com;  
ghdong@qqhru.edu.cn

#These authors contribute equally to this paper and should be considered as co-first author.

## **Characterization**

X-ray diffraction (XRD) measurements were implemented by a powder X-ray diffraction system (Rigaku, TTR-III). The X-ray photoelectron spectroscopy (XPS) measurements were implemented by a Thermo ESCALAB 250Xi spectrometer with monochromatic Al K $\alpha$  radiation ( $h\nu=1486.6$  eV). The structure was investigated by scanning electron microscope (FE-SEM) (Hitachi, SU8000) and a transmission electron microscopy (TEM) (JEOL, JEM-2010, 200 kV). Nitrogen adsorption-desorption experiments were carried out at 77.35 K by means of an Autosorb-1 (Quantachrome Instruments) analyzer.

## **Electrochemical measurements**

The measurements on the electrochemical performances were performed using a CHI 660E electrochemical workstation in a standard three-electrode mode. All electrochemical performance tests were performed in 0.5 M H<sub>2</sub>SO<sub>4</sub> solution. The working electrode was prepared by passing the slurry containing 4 mg Ni-Co<sub>4</sub>S<sub>3</sub> (Sv)/N-V<sub>2</sub>CT<sub>x</sub> (85 wt.%) with acetyleneblack (10 wt.%) and PTFE (5 wt.%) in 10 mL absolute ethanol. After that, the electrode was made by heating at 60 °C for 40 min. The as-synthesized Ni-Co<sub>4</sub>S<sub>3</sub> (Sv)/N-V<sub>2</sub>CT<sub>x</sub> slurry was coated onto the glass carbon electrode by applying suitable compressive force. The working electrode, reference electrode, and counter electrode are self-supporting electrode carrying electrocatalysts, saturated calomel electrode and graphite rods, respectively. The HER potentials used in this work are corrected with a reversible hydrogen electrode.

**Table S1** The various porous parameters of the samples

| Samples                                                          | Specific Surface Area   | Pore Diameter |
|------------------------------------------------------------------|-------------------------|---------------|
| $V_2CT_x$                                                        | 6.65 m <sup>2</sup> /g  | 3.39 nm       |
| Ni-Co <sub>4</sub> S <sub>3</sub> (S <sub>v</sub> )/N- $V_2CT_x$ | 12.58 m <sup>2</sup> /g | 2.20 nm       |

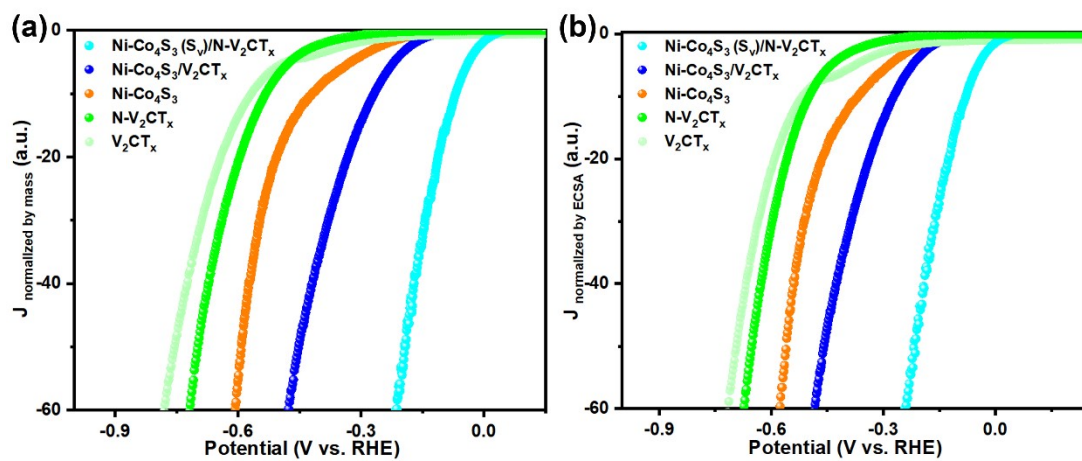

**Figure S1** LSV curves of catalysts after normalizing the current by loading mass (a) electrochemical active surface area (b).

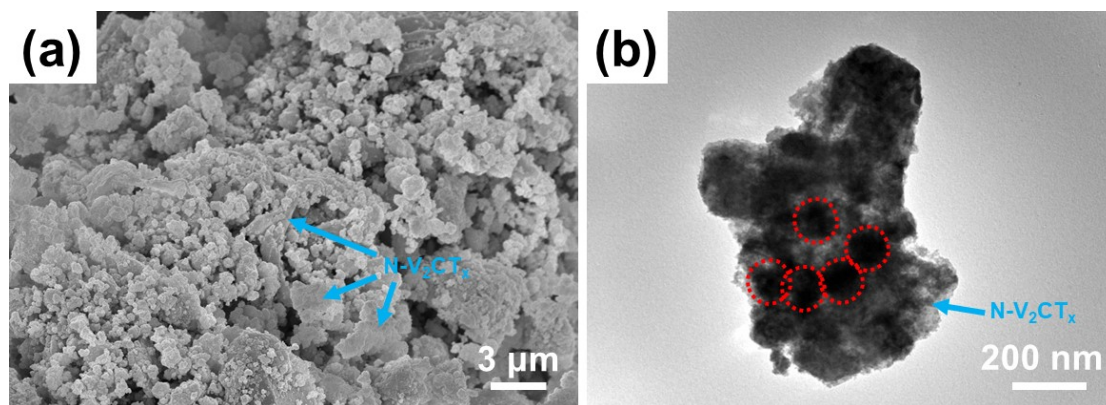

**Figure S2** SEM (a) and TEM (b) images of  $\text{Ni-Co}_4\text{S}_3$  ( $\text{S}_v$ )/ $\text{N-V}_2\text{CT}_x$  after test.
